# Supplementary material for: Rhythm Control versus Rate Control for Atrial Fibrillation and Heart Failure
Source: Atypon-hosted journal article supplement (doi:10.1056/nejmoa0708789), 2008-06-18

## Supplementary Appendix

This appendix has been provided by the authors to give readers additional information about their work.

Supplement to: Roy D, Talajic M, Nattel S, et al. Rhythm control versus rate control for atrial fibrillation and heart failure. *N Engl J Med* 2008;358:2667-77.

(PDF updated November 30, 2010.)

## APPENDIX

The following persons participated in this trial: **Executive Committee:** D. Roy (chair), M. Talajic, S. Nattel, D.G. Wyse, P. Dorian, M.G. Bourassa, J. Lambert, J.L. Rouleau; **Steering Committee:** J.M.O. Arnold, A.E. Buxton, A.J. Camm, S.S. Connolly, M. Dubuc, A. Ducharme, P.G. Guerra, S. Hohnloser, J.Y. Le Heuzey, K.L. Lee, G. O'Hara, O.D. Pedersen, I. Schmid, B.N. Singh, L.W. Stevenson, W.G. Stevenson, B. Thibault, A.L. Waldo; **Data and Safety Monitoring Board:** G. Dagenais (chair), D. Johnstone, R. Nadeau, R. Roberts, D. Roden, S. Shapiro, D.P. Zipes; **External Events Committee:** N. Racine (chair), J. Brophy, I. Dyrda, L.-H. Lebrun, G. Lalonde, A. Roussin, M. Sturmer; **Montreal Heart Institute Coordinating Center:** D. Johnson (director), M.C. Guertin (biostatistician), S. Levesque, C. Alcide, F. Desgagné, M.C. Tremblay; **Study Management:** M. Morello (coordinator), C. Bossy, M. Provencher; **Investigators:**

**Argentina** — *Instituto Argentino de Diagnostico y Tratamiento:* J. Gonzalez-Zuelgaray; *Centre Privado de Cardiologia de Tucuman:* L. Aguinaga; *Instituto de Cardiologia de Corrientes:* D. L. Pozzer; *Hospital General de Agudos J. M. Mejia:* M. V. Elizari, J. Galperin; *Clinica y Maternidad Sulzo Argentina:* S. Dubner; *Sanatorio Britannico Rosario:* R. Lanzotti; *Fundacion Rusculleda:* J. L. Serra; *Instituto Modelo de Cardiologia:* D. Boccardo; *Instituto Cardiovascular de Buenos Aires:* A. Giniger; *Hospital Privado-Centro Médico de Cordoba:* A. Caeiro; *Sanatorio Guemes:* A. Peralta, B. Sansalone. **Belgium** — *Clinique Sud Luxembourg:* G. H. Mairesse; *Cliniques Universitaires UCL de Mont-Godinne:* L. De Roy. **Brazil** — *Hospital Sao Lucas Da Pontificia Universidade Católica do Rio Grande do Sul:* C. Kalil; *Hospital Italiano de Garibaldi:* J. L. Ramos; *Instituto De Cardiologia DO RS:* G. Glotz De Lima; *Instituto de Molestias Cardiovasculares:* A. Menezes Lorga; *Hospital Pro-Cardiaco:* E. T. Mesquita; *Barra D'Or Hospital:* O. Ferreira de Souza; *Hospital Da PUC- Curitiba:* J. C. Moura Jorge; *Hospital de*

*Clinicas de Porto Alegre: L. Zim erman; Federal University of Sao Paulo: A. A. V. de Paola.*

**Canada** — *Institut de Cardiologie de Montréal: D. Roy; Institut de Cardiologie de Québec: G. O'Hara; Port Arthur Clinic: F. Nigro; Recherche Medicale St-Jérôme: D. Ouim et; Libin Cardiovascular Institute of Alberta: D. G. Wyse; Hamilton General Hospital: C. Demers; Cité de la Santé de Laval: H. Mayrand; London Health Sciences Center: J. M. O. Arnold; C.H. Pierre Le Gardeur: G. Gosselin ; Keary Medical Center: D. Rupka; Centre Hospitalier de l'Université de Montréal (CHUM)-Notre-Dame: B. Coutu; Centre Universitaire de Santé McGill (CUSM)-Hôpital Général de Montréal: T. Huynh; Hôtel-Dieu de Lévis: F. Delage ; Queen Elizabeth II Health Center: J. Sapp; St. Michael's Hospital: P. Dorian; CHUM-Hôtel-Dieu: P. Costi; C.H. de la Sagamie: G. Tremblay; Sunnybrook and Women's College Health Sciences Center: C. Joyner; Hôpital du Sacré-Cœur de Montréal: T. Kus; Cambridge General Hospital: S. Vizel; C. H. Régional de Rimouski: N. Dionne; Centre Hospitalier Universitaire de Sherbrooke Fleurimont: R. Harvey; Victoria Heart Institute: L. Sterns; Halton Heart Institute: T. Vakani; University of Alberta: S. Ki mber, K. Kavanagh; Curans Medical Research: C. Lai; CUSM-Hôpital Royal Victoria: N. Giannetti; C.H. Régional de Lanaudière: S. Kouz; CHUM-St. Luc: M. Ruel; C.H. Régional de Trois-Rivières: M. Garand; Health Sciences Center: S. Connors; Midtown Medical Center: S. Bose; Baywood Medical Center: R. Leader; Brampton Research Associates: D. Borts; Ottawa Heart Institute: D. Birnie; Hôpital Maisonneuve-Rosemont: C. Constance; Centre de Santé et de Services Sociaux de Beauce: D. Dion; Hôpital du Haut-Richelieu: D. Gossard; Royal University Hospital: R. Rajakum ar; Lakeshore General Hospital: F. Sandrin; C.H. Honoré-Mercier: D. Grandm ont; Centre Hospitalier Universitaire de Québec Cardiologie: M. Sam son; Hôpital Général Juif: C. Michel; L. Dumont Regional: R. Lee; Vancouver General Hospital: V. Bernstein; Midtown Medical Center: N. Sharma; Surrey Memorial Hospital: R. Dong; Grey Nuns Community Hospital and Health Centre: M. Senaratne ; Toronto General Hospital: D. Ing;*

*Newmarket Cardiology Research Group: Z. W ulffhart; Medecine Hat Medical Center: M. Weigel; St. Paul's Hospital: C. Kerr; Scarborough Hospital: T. Davies.* **Denmark** — *Kas Glostrup Hospital: J. Rokkedal Nielson; Esbjerg Centralsygehus: H. B. Andersen; Viborg Sygehus: H. Bagger, O.L. Pedersen; Amager Hospital: H. Nielsen, J.B. Schou; Gentofte University Hospital: O.D. Pedersen, J. Kjoergaard; Roskilde Amtssygehuset: P. Fruergaard, T. Melchoir; Hvidovre Hospital: S. Lind Rasmussen; Koge Sygehus: K. Klarlund ; Svendborg Sygehus: K. Egstrup; Bispebjerg Hospital: N. Gadsbøll, O.D. Pedersen; Kas Herlev: N. Keller .* **France** — *Hôpital Européen Georges Pompidou: J.Y. Le Heuzey; Centre Cardiologique du Nord: O. Piot; Centre Hospitalier René Dubos: P. Jourdain.* **Germany** — *J.W. Goethe University Hospital: S .H. Hohnloser; Il Med Abteilung des AK St. Georg: K.-H. Kuch; Universitätsklinikum Mannheim: M . Borggreffe.* **Israel** — *Hadassah Medical Center (Mont Scopus Campus): T. Weiss; Wolfson Medical Center: J. Rozenman; Barzilai Medical Center: L. Reisin; B'nai Zion Medical Center: E. Goldhammer; HaEmek Medical Center: T. Rozenfeld, L. Bloch; Soroka Medical Center: A. Katz; Sieff Hospital: A. Marmor; Hadassah Medical Center (Ein Karem Hospital): H. Lotan; Shaare Zedek Medical Center: D. Tzivoni; Hillel Yaffe Medical Center: M. Shochat.* **Italy** — *Ospedale di Circolo e Fondazione Macchi: J. A. Salerno Uriarte; Mater Domini Institute: T. Forzani.* **Puerto Rico** — *School of Medicine, University of Puerto Rico: M.R. Garcia -Palmieri.* **United States** — *Marshfield Medical Research Center: H. Vidaillet; Oregon Health Sciences University: M. Raitt; W.M.S. Middleton Memorial Veterans Affairs Hospital: P. Kosolcharoen; Earle A Chiles Research Institute: F. McBaron; Montefiore Medical Centre: E. C. Palma; Desert Cardiology Center: A. Rubin; Rhode Island Hospital-Lifespan Academic Center: A. E. Buxton; Veterans Affairs West Los Angeles Medical Center: B. N. Singh; Thoracic and Cardio Health Care Foundation: J. Ip; Geisinger Health System: R. Storm; Brigham and Women's Hospital: W. Stevenson; Stratton Veterans Affairs Medical Center:*

J. Sacco; *University of Louisville*: G. Bhat; *Northwest Ohio Cardiology Consultants*: N. Smiley;  
*St. Luke's-Roosevelt Hospital Center*: J. Steinberg; *MedCentre*: J. Bonet.

**On-line Table – A. Reasons for Hospitalizations**

|                                                      | <b>Rhythm-control</b> | <b>Rate-control</b> | <b>P</b> |
|------------------------------------------------------|-----------------------|---------------------|----------|
| No of patients hospitalized                          | 436 (64%)             | 409 (59%)           | 0.06     |
| No of patients hospitalized<br>during the first year | 313 (46%)             | 268 (39%)           | 0.001    |
| Total hospitalizations                               | 936                   | 895                 |          |
| Primary reason                                       |                       |                     |          |
| Cardiovascular                                       | 658 (70%)             | 601 (67%)           | 0.13     |
| Non-cardiovascular                                   | 276 (30%)             | 294 (33%)           |          |
| Not classified                                       | 2                     | 0                   |          |
| Cardiovascular                                       |                       |                     |          |
| Worsening CHF                                        | 270 (29%)             | 280 (31%)           | 0.26     |
| AF                                                   | 133 (14%)             | 80 (9%)             | <0.001   |
| Bradycardia                                          | 52 (6%)               | 30 (3%)             | 0.023    |
| Ventricular tachycardia                              | 32 (3%)               | 33 (4%)             | 0.76     |
| Cardiac procedure                                    | 70 (7%)               | 66 (7%)             | 0.93     |

| <b>On-line Table – B. Procedures and Other Events after Randomization</b> |                       |                     |          |
|---------------------------------------------------------------------------|-----------------------|---------------------|----------|
| <b>N. (% of pts)</b>                                                      | <b>Rhythm-control</b> | <b>Rate-control</b> | <b>P</b> |
|                                                                           | <b>N = 682</b>        | <b>N = 694</b>      |          |
| Electrical cardioversion                                                  | 268 (59%)             | 52 (9%)             | <0.001   |
| Pacemaker therapy                                                         | 64 (9%)               | 70 (10%)            | 0.66     |
| Implantable defibrillator                                                 | 53 (8%)               | 71 (10%)            | 0.11     |
| CRT 23                                                                    |                       | 24                  |          |
| Catheter ablation                                                         | 22 (3.2%)             | 24 (3.5%)           | 0.81     |
| AVN 7                                                                     |                       | 21                  |          |
| VT*                                                                       | 36 (5.3%)             | 37 (5.3%)           | 0.97     |
| Torsades de pointes                                                       | 1                     | 0                   |          |
| Bradyarrhythmias**                                                        | 58 (8.5%)             | 34 (4.9%)           | 0.007    |
| Major non-CNS hemorrhage                                                  | 30 (4.4%)             | 25 (3.6%)           | 0.45     |

\*Defined as a ventricular tachyarrhythmia (including torsades de pointes) requiring hospitalization, lasting  $\geq 30$  seconds, causing syncope or requiring urgent treatment which included defibrillator therapy.

\*\*Defined as a bradyarrhythmia requiring hospitalization, pacemaker implantation or a change of treatment strategy.

CHF denotes congestive heart failure, AF atrial fibrillation, CRT cardiac resynchronization therapy, AVN atrioventricular nodal ablation, CNS central nervous system.

## **ON-LINE FIGURE LEGENDS**

On-line Figure 1. Randomization, follow-up and outcomes.

On-line Figure 2. Hazard ratios and 95% confidence intervals (CI) in 10 prespecified subgroups for cardiovascular death. Points to the left of the vertical line of unity indicate better results in the rhythm-control group.

Enrollment: 2001-2005, Common Final Follow-up: June 2007

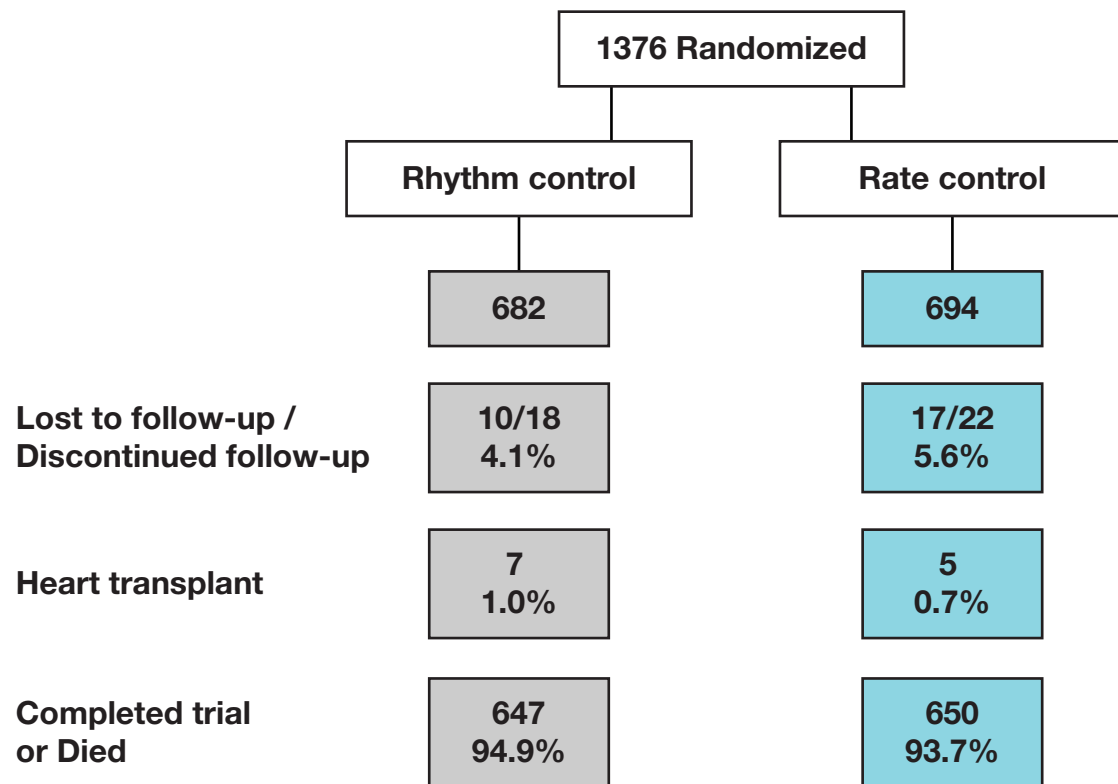

Mean follow-up: 37±19 months (74 months) Median follow-up for surviving pts: 47 months

On-line figure 2

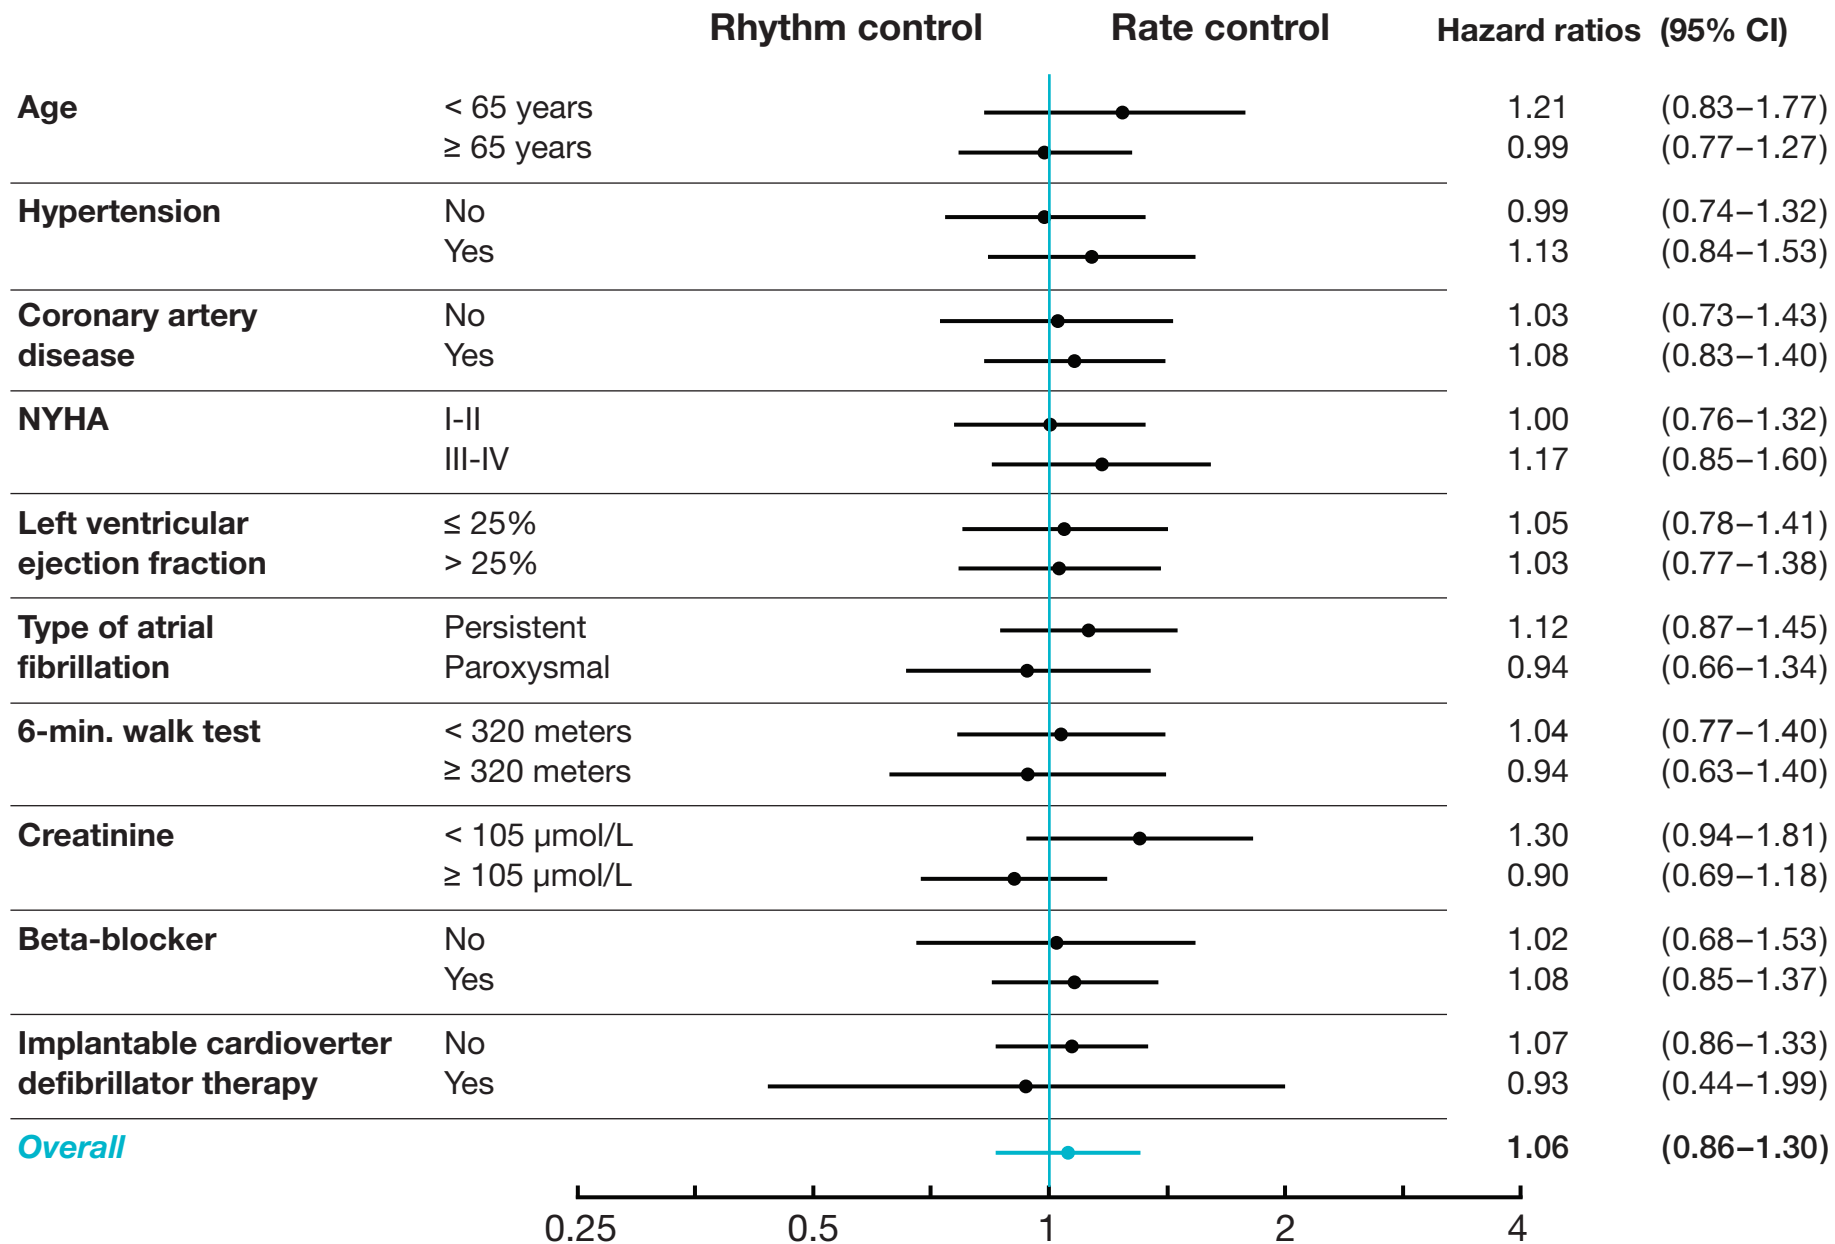

Supplement: nejm_roy_2667sa1.pdf [file nejm_roy_2667sa1.pdf]
